# Supplementary material
Source: PubMed Central journal article supplement (PMC7263818)
Supplement: mmc1.pdf [file mmc1.pdf]

# THE LANCET

## Child & Adolescent Health

### Supplementary appendix

This appendix formed part of the original submission and has been peer reviewed.  
We post it as supplied by the authors.

Supplement to: Wolfler A, Mannarino S, Giacomet V, Camporesi A, Zuccotti G. Acute myocardial injury: a novel clinical pattern in children with COVID-19. *Lancet Child Adolesc Health* 2020; published online June 1. [https://doi.org/10.1016/S2352-4642\(20\)30168-1](https://doi.org/10.1016/S2352-4642(20)30168-1).

**Table.** Demographic, clinical characteristics, blood tests results and therapy of the five children enrolled. Virologic tests use a PCR technique on nasopharyngeal swab or aspirates. Serologic tests are made on blood sample.

|                                                          | Patient 1                 | Patient 2                                                                                     | Patient 3                 | Patient 4                 | Patient 5                                               |
|----------------------------------------------------------|---------------------------|-----------------------------------------------------------------------------------------------|---------------------------|---------------------------|---------------------------------------------------------|
| <b>Gender</b>                                            | M                         | M                                                                                             | F                         | F                         | F                                                       |
| <b>Age, months</b>                                       | 72                        | 168                                                                                           | 2                         | 132                       | 48                                                      |
| <b>Clinical symptoms:</b>                                |                           |                                                                                               |                           |                           |                                                         |
| <b>Fever</b>                                             | +                         | +                                                                                             | +                         | +                         | +                                                       |
| <b>Diarrhoea</b>                                         | +                         | +                                                                                             | +                         | +                         | +                                                       |
| <b>Vomiting</b>                                          | +                         | +                                                                                             | +                         |                           |                                                         |
| <b>Asthenia</b>                                          |                           | +                                                                                             |                           | +                         | +                                                       |
| <b>Dyspnoea</b>                                          |                           | +                                                                                             |                           |                           |                                                         |
| <b>Days of illness upon presentation</b>                 | 8                         | 7                                                                                             | 1                         | 5                         | 5                                                       |
| <b>SARS-CoV-2 test</b>                                   | Nasopharyngeal swab - PCR | Nasopharyngeal swab - PCR                                                                     | Nasopharyngeal swab - PCR | Nasopharyngeal swab - PCR | Nasopharyngeal swab - PCR                               |
| <b>Cardiac parameters on PICU admission:</b>             |                           |                                                                                               |                           |                           |                                                         |
| <b>HR – bpm</b>                                          | 155                       | 138                                                                                           | 174                       | 151                       | 157                                                     |
| <b>SBP - mmHg</b>                                        | 84                        | 80                                                                                            | 75                        | 68                        | 72                                                      |
| <b>ECG anomalies</b>                                     | ST waves abnormalities    | - ST waves abnormalities<br>- QTc 580 ms<br>- T negative waves D2-D3<br>- Atrial fibrillation | ST waves abnormalities    | ST waves abnormalities    | - ST waves abnormalities<br>- T negative waves in D2-D3 |
| <b>Echocardiogram:</b>                                   |                           |                                                                                               |                           |                           |                                                         |
| <b>Ejection fraction, %</b>                              | 38%                       | 48%                                                                                           | 53%                       | 55%                       | 40%                                                     |
| <b>Ventricular dysfunction</b>                           | Moderate                  | Mild                                                                                          | Mild                      | Mild                      | Moderate                                                |
| <b>Coronary artery anomalies</b>                         | None                      | None                                                                                          | None                      | None                      | None                                                    |
| <b>Mitral valve regurgitation</b>                        | Yes                       | Yes                                                                                           | No                        | Yes                       | Yes                                                     |
| <b>Blood tests:</b>                                      |                           |                                                                                               |                           |                           |                                                         |
| <b>ALT - U/L (nv &lt; 33)</b>                            | 30                        | 213                                                                                           | 18                        | 18                        | 145                                                     |
| <b>Serum Albumin – g/L (nv 35 - 50)</b>                  | N/A                       | N/A                                                                                           | N/A                       | 24                        | 42                                                      |
| <b>Hb - g/dL (nv 12.5 – 15.5)</b>                        | 10.3                      | 12.5                                                                                          | 7.9                       | 9.7                       | 8.1                                                     |
| <b>Platelets - 10<sup>9</sup>/L (nv &gt; 130)</b>        | 268                       | 312                                                                                           | 349                       | 241                       | 171                                                     |
| <b>WBC - 10<sup>9</sup>/L (nv 4.5 – 10)</b>              | 4.49                      | 3.54                                                                                          | 7.41                      | 2.86                      | 5.33                                                    |
| <b>Neutrophils - % (nv 40 – 72)</b>                      | 45                        | 90                                                                                            | 74                        | 83                        | 81                                                      |
| <b>Urine WBC – N/μL (nv &lt; 15)</b>                     | N/A                       | 5                                                                                             | N/A                       | N/A                       | N/A                                                     |
| <b>Sodium - mEq/L (nv 135 - 45)</b>                      | 136                       | 137                                                                                           | 138                       | 137                       | 132                                                     |
| <b>Interleukine 6 - ng/L (nv &lt; 7)</b>                 | 52                        | 392                                                                                           | 236                       | 27                        | 699                                                     |
| <b>d-Dimer - μg/L (nv &lt; 500)</b>                      | 6073                      | 4881                                                                                          | 1918                      | 1267                      | 4084                                                    |
| <b>Ferritin - μg/L (nv &gt; 100)</b>                     | 153                       | 2121                                                                                          | 136                       | -                         | 380                                                     |
| <b>C Reactive Protein – mg/L (nv &lt; 10)</b>            | 124                       | 432                                                                                           | 35                        | 211                       | 292                                                     |
| <b>Procalcitonin - μg/L (nv &lt; 2)</b>                  | 46                        | 39                                                                                            | 2                         | 1.1                       | 36                                                      |
| <b>Nt-proBNP – ng/L (nv &lt; 450)</b>                    | 20518                     | 35000                                                                                         | 3353                      | 5293                      | 32839                                                   |
| <b>Troponine – ng/L (nv &lt;15)</b>                      | 112                       | 1497                                                                                          | 150                       | 126                       | 85                                                      |
| <b>Therapies:</b>                                        |                           |                                                                                               |                           |                           |                                                         |
| <b>IVIg (2gr/kg)</b>                                     | +                         |                                                                                               | +                         | +                         | +                                                       |
| <b>Steroid</b>                                           |                           | +                                                                                             |                           |                           |                                                         |
| <b>Hydroxychloroquine</b>                                |                           |                                                                                               |                           | +                         |                                                         |
| <b>Tocilizumab</b>                                       |                           | +                                                                                             |                           |                           |                                                         |
| <b>Inotrope</b>                                          | Epinephrine               | Epinephrine<br>+ PDE3 inhibitor                                                               | Epinephrine               |                           | Epinephrine                                             |
| <b>Antibiotic</b>                                        | +                         | +                                                                                             | +                         | +                         | +                                                       |
| <b>Prophylactic LMWH</b>                                 | +                         | +                                                                                             |                           | +                         | +                                                       |
| <b>Virologic tests:</b>                                  |                           |                                                                                               |                           |                           |                                                         |
| <b>Parainfluenza 1-4 Coronavirus</b>                     |                           |                                                                                               |                           |                           |                                                         |
| <b>Human metapneumovirus Respiratory syncytial virus</b> |                           |                                                                                               |                           |                           |                                                         |
| <b>Adenovirus A-G</b>                                    | All negative              | All negative                                                                                  | All negative              | All negative              | All negative                                            |
| <b>Enterovirus</b>                                       |                           |                                                                                               |                           |                           |                                                         |
| <b>Bocavirus</b>                                         |                           |                                                                                               |                           |                           |                                                         |
| <b>Parechovirus</b>                                      |                           |                                                                                               |                           |                           |                                                         |

|                                 |   |   |   |   |    |
|---------------------------------|---|---|---|---|----|
| <b>Serologic tests:</b>         |   |   |   |   |    |
| <b>Coxsackie B IgM</b>          |   |   |   |   |    |
| <b>Parvovirus B19 IgM - IgG</b> |   |   |   |   |    |
| <b>PICU LOS, dd</b>             | 3 | 5 | 3 | 1 | 5  |
| <b>Hospital LOS, dd</b>         | 5 | 7 | 5 | 9 | 10 |

**Legend:** HR = heart rate; SBP = systolic blood pressure; ECG = electrocardiogram; mo = months; Hb = hemoglobin; WBC = white blood cell; NT-proBNP = N terminal pro brain natriuretic peptide; IVIG = intravenous immunoglobulin; PICU = Pediatric Intensive Care Unit; LOS = length of stay; LMWH = low molecular weight heparin; nv = normal value; PCR = polymerase chain reaction ; N/A = not available
